# Supplementary material for: snRNAs from Radical Prostatectomy Specimens Have the Potential to Serve as Prognostic Factors for Clinical Recurrence after Biochemical Recurrence in Patients with High-Risk Prostate Cancer
Source: MDPI journal article supplement (doi:10.3390/cancers16091757), 2024-05-01
Supplement: s1 [file s1]

**Supplementary Table S1.** Clinicopathological characteristics of 67 patients with HRPC who experienced BCR after RP (post-RP BCR).

| No. | Group  | Age at RP | PSA (ng/ml) | ISUP grading group | pT | pN | RM | Metastasis    | Time to BCR from RP (month) | Time to CR from RP (month) |
|-----|--------|-----------|-------------|--------------------|----|----|----|---------------|-----------------------------|----------------------------|
| 1   | CR     | 69        | 18.2        | 5                  | 3b | 0  | 1  | OSS           | 0.0                         | 0.0                        |
| 2   | CR     | 72        | 99.0        | 5                  | 3b | 1  | 1  | PUL, LYM      | 0.0                         | 1.4                        |
| 3   | CR     | 69        | 12.0        | 5                  | 3a | 0  | 1  | OSS           | 0.0                         | 42.8                       |
| 4   | CR     | 73        | 28.1        | 5                  | 4  | 0  | 1  | PUL, LYM, OSS | 0.0                         | 47.9                       |
| 5   | CR     | 70        | 15.0        | 5                  | 4  | 0  | 1  | OSS           | 5.2                         | 64.7                       |
| 6   | CR     | 67        | 17.0        | 4                  | 2b | 0  | 0  | OSS           | 32.1                        | 143.5                      |
| 7   | CR     | 58        | 16.0        | 5                  | 3b | 0  | 1  | LYM           | 10.2                        | 20.4                       |
| 8   | CR     | 63        | 7.3         | 5                  | 3b | 0  | 0  | LYM           | 12.5                        | 21.3                       |
| 9   | CR     | 59        | 37.3        | 5                  | 3a | 0  | 1  | OSS           | 0.0                         | 4.4                        |
| 10  | CR     | 66        | 14.5        | 5                  | 3a | 0  | 1  | LYM, OSS      | 0.0                         | 3.6                        |
| 11  | CR     | 58        | 37.2        | 5                  | 3a | 0  | 0  | OSS           | 12.4                        | 44.4                       |
| 12  | CR     | 64        | 16.8        | 3                  | 3a | 0  | 0  | LYM, OSS      | 0.0                         | 22.4                       |
| 13  | CR     | 60        | 5.9         | 4                  | 4  | 0  | 1  | LYM, OSS      | 0.0                         | 5.1                        |
| 14  | CR     | 70        | 52.4        | 3                  | 4  | 0  | 1  | LYM           | 14.1                        | 16.8                       |
| 15  | CR     | 61        | 32.9        | 5                  | 4  | 0  | 1  | OSS           | 0.0                         | 7.8                        |
| 16  | CR     | 53        | 28.7        | 4                  | 4  | 0  | 1  | LYM, OSS      | 0.0                         | 85.8                       |
| 17  | CR     | 59        | 20.8        | 4                  | 4  | 0  | 1  | OSS           | 0.0                         | 3.9                        |
| 18  | CR     | 81        | 13.7        | 5                  | 3b | 0  | 1  | LYM, OSS      | 34.8                        | 74.7                       |
| 19  | CR     | 68        | 15.0        | 4                  | 3a | 0  | 1  | LYM           | 37.3                        | 108.7                      |
| 20  | CR     | 68        | 7.1         | 4                  | 3a | 0  | 1  | OSS           | 88.1                        | 95.3                       |
| 21  | CR     | 69        | 9.3         | 4                  | 3b | 0  | 1  | OSS           | 15.2                        | 131.1                      |
| 22  | non-CR | 63        | 11.3        | 5                  | 3b | 0  | 1  |               | 24.0                        |                            |
| 23  | non-CR | 68        | 86.6        | 5                  | 3b | 0  | 1  |               | 4.0                         |                            |
| 24  | non-CR | 63        | 165.1       | 5                  | 3b | 0  | 1  |               | 7.0                         |                            |
| 25  | non-CR | 62        | 26.3        | 5                  | 4  | 0  | 1  |               | 21.0                        |                            |
| 26  | non-CR | 64        | 69.1        | 5                  | 4  | 0  | 1  |               | 12.0                        |                            |
| 27  | non-CR | 60        | 13.6        | 5                  | 3a | 0  | 0  |               | 28.0                        |                            |
| 28  | non-CR | 75        | 33.5        | 5                  | 4  | 0  | 1  |               | 3.0                         |                            |
| 29  | non-CR | 71        | 16.4        | 5                  | 3b | 0  | 1  |               | 2.0                         |                            |
| 30  | non-CR | 68        | 7.2         | 5                  | 2c | 0  | 1  |               | 15.0                        |                            |
| 31  | non-CR | 75        | 8.7         | 5                  | 3a | 1  | 1  |               | 1.0                         |                            |
| 32  | non-CR | 76        | 7.4         | 5                  | 3a | 0  | 0  |               | 25.0                        |                            |
| 33  | non-CR | 64        | 62.4        | 4                  | 3b | 0  | 1  |               | 5.0                         |                            |
| 34  | non-CR | 62        | 40.1        | 5                  | 3a | 0  | 0  |               | 2.0                         |                            |
| 35  | non-CR | 68        | 9.2         | 5                  | 2c | 0  | 1  |               | 11.0                        |                            |
| 36  | non-CR | 68        | 6.4         | 4                  | 3a | 0  | 1  |               | 6.0                         |                            |
| 37  | non-CR | 64        | 67.4        | 5                  | 2c | 0  | 1  |               | 19.0                        |                            |
| 38  | non-CR | 71        | 12.9        | 4                  | 3b | 0  | 1  |               | 40.0                        |                            |
| 39  | non-CR | 64        | 29.0        | 5                  | 3a | 0  | 0  |               | 16.0                        |                            |
| 40  | non-CR | 64        | 7.4         | 5                  | 3b | 0  | 0  |               | 5.0                         |                            |
| 41  | non-CR | 64        | 15.67       | 5                  | 3a | 0  | 1  |               | 34.0                        |                            |
| 42  | non-CR | 70        | 34.2        | 5                  | 4  | 0  | 1  |               | 45.0                        |                            |
| 43  | non-CR | 73        | 47.5        | 5                  | 3b | 0  | 0  |               | 9.0                         |                            |
| 44  | non-CR | 59        | 77.32       | 5                  | 3b | 0  | 1  |               | 5.0                         |                            |

|    |        |    |       |   |    |   |   |      |
|----|--------|----|-------|---|----|---|---|------|
| 45 | non-CR | 49 | 12.1  | 5 | 2b | 0 | 0 | 20.0 |
| 46 | non-CR | 73 | 17.9  | 5 | 2b | 0 | 0 | 24.0 |
| 47 | non-CR | 65 | 36.2  | 5 | 3b | 0 | 1 | 10.0 |
| 48 | non-CR | 65 | 81.7  | 5 | 3b | 0 | 1 | 1.0  |
| 49 | non-CR | 69 | 9.6   | 4 | 3b | 0 | 1 | 60.0 |
| 50 | non-CR | 70 | 218.9 | 4 | 4  | 0 | 1 | 22.0 |
| 51 | non-CR | 61 | 15.9  | 4 | 4  | 0 | 1 | 0.0  |
| 52 | non-CR | 63 | 12.1  | 5 | 3a | 0 | 1 | 12.0 |
| 53 | non-CR | 74 | 16.2  | 5 | 4  | 0 | 1 | 3.0  |
| 54 | non-CR | 64 | 94.3  | 4 | 4  | 0 | 1 | 16.0 |
| 55 | non-CR | 54 | 10.4  | 5 | 3a | 0 | 0 | 37.0 |
| 56 | non-CR | 59 | 7.9   | 4 | 2b | 0 | 1 | 21.0 |
| 57 | non-CR | 72 | 170   | 5 | 3a | 0 | 1 | 46.0 |
| 58 | non-CR | 63 | 6.8   | 5 | 3a | 0 | 1 | 42.0 |
| 59 | non-CR | 50 | 14.1  | 4 | 3b | 0 | 1 | 36.0 |
| 60 | non-CR | 70 | 3.3   | 4 | 3b | 0 | 1 | 58.0 |
| 61 | non-CR | 73 | 8.4   | 4 | 3a | 0 | 1 | 6.0  |
| 62 | non-CR | 74 | 14.2  | 4 | 3a | 0 | 1 | 5.0  |
| 63 | non-CR | 64 | 25.1  | 4 | 3a | 0 | 1 | 1.0  |
| 64 | non-CR | 71 | 29.2  | 5 | 2b | 0 | 1 | 0.0  |
| 65 | non-CR | 65 | 16.3  | 5 | 3b | 0 | 0 | 5.0  |
| 66 | non-CR | 70 | 8.4   | 5 | 3a | 0 | 1 | 7.0  |
| 67 | non-CR | 68 | 10.0  | 5 | 3a | 0 | 0 | 46.0 |

Abbreviation: BCR, biochemical recurrence; CR, clinical recurrence; HRPC, high-risk prostate cancer; ISUP, International Society of Urological Pathology; LYM, lymph node metastasis; OSS, osseous metastasis; PSA, prostate specific antigen; pN, pathological T stage; pT, pathological T stage; PUL, pulmonary metastasis; RP, radical prostatectomy; RM, resection margin.
