# Supplementary material for: snRNAs from Radical Prostatectomy Specimens Have the Potential to Serve as Prognostic Factors for Clinical Recurrence after Biochemical Recurrence in Patients with High-Risk Prostate Cancer
Source: MDPI journal article supplement (doi:10.3390/cancers16091757), 2024-05-01
Supplement: s1 [file s1]

**Supplementary Table S3.** The top 50 most highly expressed snRNA genes detected by RNA-seq of the FFPE RP samples from patients with HRPC who developed CR after post-RP BCR (gene analysis).

| No. | Gene ID         | Gene symbol       | TPM, no. (%) <sup>†</sup> |
|-----|-----------------|-------------------|---------------------------|
| 1   | ENSG00000202538 | <i>RNU4-2</i>     | 9,476.2 (0.95%)           |
| 2   | ENSG00000206652 | <i>RNU1-1</i>     | 3,678.7 (0.37%)           |
| 3   | ENSG00000200795 | <i>RNU4-1</i>     | 1,954.3 (0.20%)           |
| 4   | ENSG00000207005 | <i>RNU1-2</i>     | 1,523.2 (0.15%)           |
| 5   | ENSG00000277918 | <i>RNVUI-28</i>   | 1,519.4 (0.15%)           |
| 6   | ENSG00000200156 | <i>RNU5B-1</i>    | 1,122.4 (0.11%)           |
| 7   | ENSG00000207389 | <i>RNU1-4</i>     | 983.5 (0.10%)             |
| 8   | ENSG00000206585 | <i>RNVUI-7</i>    | 838.4 (0.08%)             |
| 9   | ENSG00000206737 | <i>RNVUI-18</i>   | 717.7 (0.07%)             |
| 10  | ENSG00000270722 | <i>RNVUI-31</i>   | 622.1 (0.06%)             |
| 11  | ENSG00000199568 | <i>RNU5A-1</i>    | 616.1 (0.06%)             |
| 12  | ENSG00000238554 | <i>RNU1-88P</i>   | 402.7 (0.04%)             |
| 13  | ENSG00000252498 | <i>RNU6-1016P</i> | 291.1 (0.03%)             |
| 14  | ENSG00000206762 | <i>RNU6-418P</i>  | 258.8 (0.03%)             |
| 15  | ENSG00000221676 | <i>RNU6ATAC</i>   | 241.6 (0.02%)             |
| 16  | ENSG00000264229 | <i>RNU4ATAC</i>   | 236.7 (0.02%)             |
| 17  | ENSG00000273768 | <i>RNVUI-29</i>   | 224.7 (0.02%)             |
| 18  | ENSG00000239119 | <i>RNU7-119P</i>  | 220.5 (0.02%)             |
| 19  | ENSG00000252645 | <i>RNU7-111P</i>  | 218.1 (0.02%)             |
| 20  | ENSG00000274210 | <i>RNVUI-27</i>   | 210.1 (0.02%)             |
| 21  | ENSG00000238829 | <i>RNU7-45P</i>   | 150.6 (0.02%)             |
| 22  | ENSG00000200665 | <i>RNU6-1188P</i> | 149.6 (0.01%)             |
| 23  | ENSG00000207175 | <i>RNU1-67P</i>   | 145.5 (0.01%)             |
| 24  | ENSG00000253054 | <i>RNU7-77P</i>   | 145.0 (0.01%)             |
| 25  | ENSG00000200882 | <i>RNU6-681P</i>  | 142.9 (0.01%)             |
| 26  | ENSG00000251870 | <i>RNU2-69P</i>   | 142.7 (0.01%)             |
| 27  | ENSG00000201198 | <i>RNU6-879P</i>  | 141.0 (0.01%)             |
| 28  | ENSG00000277610 | <i>RNVUI-4</i>    | 127.6 (0.01%)             |
| 29  | ENSG00000239151 | <i>RNU7-195P</i>  | 126.9 (0.01%)             |
| 30  | ENSG00000251718 | <i>RNU2-13P</i>   | 123.8 (0.01%)             |
| 31  | ENSG00000252796 | <i>RNU7-11P</i>   | 121.9 (0.01%)             |
| 32  | ENSG00000200814 | <i>RNU6-595P</i>  | 121.5 (0.01%)             |
| 33  | ENSG00000238719 | <i>RNU7-96P</i>   | 118.3 (0.01%)             |
| 34  | ENSG00000278099 | <i>RNVUI-2A</i>   | 116.9 (0.01%)             |
| 35  | ENSG00000238386 | <i>RNU7-48P</i>   | 116.2 (0.01%)             |
| 36  | ENSG00000251712 | <i>RNU7-20P</i>   | 115.6 (0.01%)             |
| 37  | ENSG00000272215 | <i>U7</i>         | 111.5 (0.01%)             |
| 38  | ENSG00000283509 | <i>U6</i>         | 106.6 (0.01%)             |
| 39  | ENSG00000212327 | <i>RNU6-882P</i>  | 103.9 (0.01%)             |
| 40  | ENSG00000212457 | <i>RNU6-644P</i>  | 96.9 (0.01%)              |
| 41  | ENSG00000202017 | <i>RNU6-806P</i>  | 95.9 (0.01%)              |
| 42  | ENSG00000252452 | <i>RNU6-107P</i>  | 94.9 (0.01%)              |
| 43  | ENSG00000252431 | <i>RNU6-1247P</i> | 89.9 (0.01%)              |
| 44  | ENSG00000201616 | <i>RNU1-91P</i>   | 89.3 (0.01%)              |

|    |                 |                  |              |
|----|-----------------|------------------|--------------|
| 45 | ENSG00000212332 | <i>RNU6-780P</i> | 88.7 (0.01%) |
| 46 | ENSG00000252756 | <i>RNU6-577P</i> | 87.8 (0.01%) |
| 47 | ENSG00000199872 | <i>RNU6-942P</i> | 86.6 (0.01%) |
| 48 | ENSG00000222610 | <i>RNU6-402P</i> | 86.2 (0.01%) |
| 49 | ENSG00000272160 | <i>RNU4-5P</i>   | 85.6 (0.01%) |
| 50 | ENSG00000199512 | <i>RNU6-212P</i> | 83.8 (0.01%) |

---

†: Transcripts per million (TPM) represents the relative abundance of a transcript among a population of sequenced transcripts  
Abbreviation: BCR, biochemical recurrence; CR, clinical recurrence; FFPE, formalin-fixed paraffin-embedded; HRPC, high-risk prostate cancer; RP, radical prostatectomy; snRNA, small nuclear RNA.
